# Supplementary material for: Network neighborhood operates as a drug repositioning method for cancer treatment
Source: PeerJ. 2023 Jul 10;11:e15624. doi: 10.7717/peerj.15624 (PMC10340098; doi:10.7717/peerj.15624)
Supplement: Supplemental Information 3 — The predictions of MNBDR are compared with three network metrics implemented in the current model. [file peerj-11-15624-s003.xlsx]

## Sheet: Colon
MNBDR		Adamic-Adar-2		Page Rank-2		Neighborhood Scoring
Drug	Score	Drug	Combined.AUC	Drug	Combined.AUC	Drug	Combined.AUC
mepacrine	75.0163	PHA-793887	0.6350709	AT-7519	0.6138908	gsk-1904529a	0.6647905
camptothecin	56.7819	gefitinib	0.6265779	Dabrafenib	0.6043960	KIN001-266	0.6514579
Bortezomib	52.6529	Nelarabine	0.6222220	cytarabine	0.6040870	Pilaralisib	0.6241133
digoxin	48.8874	pterostilbene	0.6166361	Alectinib	0.6027235	quercetin	0.6240106
podophyllotoxin	47.6954	bx-795	0.6127359	Dasatinib	0.6007651	Leflunomide	0.6230733
unc-0638	46.1793	Y-39983	0.6108934	Y-39983	0.5975005	LDN-193189	0.6184608
dolastatin-10	43.9186	gefitinib	0.6108542	Refametinib	0.5940428	sorafenib	0.6114877
Dinaciclib	41.5918	enoxolone	0.6102942	KX2-391	0.5885647	tozasertib	0.6093575
PD-153035	40.864	alisertib	0.6067256	ZM-447439	0.5879202	zstk-474	0.6089705
Docetaxel	39.2453	AT-7519	0.6010682	Dinaciclib	0.5876187	amsacrine	0.6059116
andrographolide	37.3443	ZM-447439	0.5986345	osimertinib	0.5874954	Taselisib	0.6034445
PD-184352	35.4188	KIN001-244	0.5975459	PF-562271	0.5857273	Venetoclax	0.6010015
BMS-345541	35.3852	Olaparib	0.5947521	mitoxantrone	0.5851589	gemcitabine	0.6000415
Voxtalisib	35.089	lapatinib	0.5943454	unc-0638	0.5845515	apabetalone	0.5992493
Refametinib	34.8094	palbociclib	0.5914860	belinostat	0.5844515	Quizartinib	0.5968457
cladribine	33.5959	AZD-8055	0.5907038	Nelarabine	0.5831668	pazopanib	0.5967522
colchicine	33.2073	Masitinib	0.5906922	alisertib	0.5829570	SB-590885	0.5952772
Ro-4987655	32.9743	PF-562271	0.5896899	GDC-0941	0.5795773	ym-201636	0.5945409
PF-562271	32.1831	bosutinib	0.5871329	GDC-0941	0.5753678	Ro-4987655	0.5929658
Dasatinib	32.1604	MLN-8054	0.5864455	resveratrol	0.5752614	Dasatinib	0.5929501
fluorouracil	32.043	BMS-345541	0.5864432	thalidomide	0.5752412	Alpelisib	0.5915214
doxorubicin	31.4336	GDC-0941	0.5849236	BMS-345541	0.5749176	SB-590885	0.5903084
Alpelisib	30.2855	cytarabine	0.5831254	gsk-1070916	0.5740973	QL-XII-47	0.5901391
bardoxolone-methyl	29.8448	Dinaciclib	0.5817463	Cabozantinib	0.5734353	MK-2206	0.5900297
Etoposide	29.3648	sorafenib	0.5809921	methoxsalen	0.5733556	HG-5-113-01	0.5884932
TH-302	28.7263	aurora-a-inhibitor-i	0.5809448	aurora-a-inhibitor-i	0.5732156	I-BET-762	0.5875536
