# Supplementary material for: Network neighborhood operates as a drug repositioning method for cancer treatment
Source: PeerJ. 2023 Jul 10;11:e15624. doi: 10.7717/peerj.15624 (PMC10340098; doi:10.7717/peerj.15624)
Supplement: Supplemental Information 4 — The predictions of MNBDR are compared with three network metrics implemented in the current model. [file peerj-11-15624-s004.xlsx]

## Sheet: Prostate
MNBDR		Adamic-Adar-2		Page Rank-2		Neighborhood Scoring
Drug	Score	Drug	Combined.AUC	Drug	Combined.AUC	Drug	Combined.AUC
Taselisib	70.76	Tamoxifen	0.8068972	gsk-1904529a	0.6982582	Phenformin	0.6857098
MG-132	64.1132	Phenformin	0.6972071	ACY-1215	0.6821566	docetaxel	0.6512628
triptolide	55.5124	naftopidil	0.6320268	NVP-BEZ235	0.6358657	QL-XII-47	0.6398273
SN-38	52.1816	gsk-1904529a	0.6318783	GSK-690693	0.6352532	gsk-2126458	0.6352606
ym-155	52.026	QL-XII-47	0.6224224	Rucaparib	0.6302162	NU-7441	0.6280236
Pevonedistat	49.8274	NVP-BEZ235	0.6151603	Linsitinib	0.6243954	irinotecan	0.6265663
irinotecan	46.7813	tretinoin_PC3_30	0.6135390	MG-132	0.6206526	gsk-1904529a	0.6251511
PHA-793887	44.5228	vorinostat	0.6130332	AGI-5198	0.6163678	gemcitabine	0.6234424
ym-201636	43.863	NVP-TAE226	0.6064486	serdemetan	0.6157223	ciprofloxacin	0.6192417
Foretinib	43.3814	AZD-7762	0.6029375	TAK-715	0.6156999	PHA-793887	0.6130333
Dinaciclib	43.0736	ACY-1215	0.5996549	NVP-BEZ235	0.6097853	etoposide	0.6110183
camptothecin	40.0758	JW-7-24-1	0.5984861	entinostat	0.6017216	unc-1215	0.6085715
NVP-BEZ235	39.2942	palbociclib	0.5982808	azd-6482	0.6003303	OSI-027	0.6042912
staurosporine	37.9105	AZD-7762	0.5931802	Voxtalisib	0.5985875	Linsitinib	0.5964273
mitoxantrone	37.8586	Rucaparib	0.5898806	QL-X-138	0.5948788	pazopanib	0.5947952
JNK-9L	37.2655	PHA-793887	0.5888048	ym-155	0.5948063	Dabrafenib	0.5909653
midostaurin	37.046	NVP-BEZ235	0.5884324	mitoxantrone	0.5934001	gdc-0068	0.5905949
mitomycin-c	36.4727	mitoxantrone	0.5882622	gsk-2126458	0.5920750	PI-103	0.5839912
troglitazone	36.2026	Lenalidomide	0.5875073	tretinoin_PC3_30	0.5910193	erlotinib	0.5835310
Fulvestrant	34.8973	JNK-9L	0.5864459	ciprofloxacin	0.5898276	TH-302	0.5824422
Voxtalisib	34.6034	Refametinib	0.5859757	QL-XII-47	0.5888227	gemcitabine	0.5796500
Venetoclax	34.2525	Idelalisib	0.5853482	palbociclib	0.5871508	apabetalone	0.5790505
doxorubicin	33.7471	Y-39983	0.5838808	Refametinib	0.5852134	NVP-AUY922	0.5782133
Bortezomib	33.5614	vismodegib	0.5838277	Tivozanib	0.5848653	IOX2	0.5751523
