# Supplementary material for: Network neighborhood operates as a drug repositioning method for cancer treatment
Source: PeerJ. 2023 Jul 10;11:e15624. doi: 10.7717/peerj.15624 (PMC10340098; doi:10.7717/peerj.15624)
Supplement: Supplemental Information 9 — The performance of OCTAD is given in the sRGES column that should be -0.25 or lower for significant results. [file peerj-11-15624-s009.xlsx]

## Sheet: OCTAD - Colon cancer
Drug name	sRGES
thonzonium	-0.478494
tolmetin	-0.472092
dabrafenib	-0.453816
ampicillin	-0.43842
thiomersal	-0.432272
targinine	-0.413011
luteolin	-0.408391
camptothecin	-0.39686
lofepramine	-0.396683
nifenazone	-0.396195
peruvoside	-0.395145
felbinac	-0.390334
tacrine	-0.38697
BMS-387032	-0.3867
chloramphenicol	-0.386057
torin-2	-0.382327
acetylcholine	-0.38175
panobinostat	-0.379457
furaltadone	-0.37599
PI-828	-0.375509
triptolide	-0.375013
torin-1	-0.374399
buparlisib	-0.373369
actinomycin-d	-0.373321
dirithromycin	-0.372224
SN-38	-0.368093
bimatoprost	-0.366327
WYE-125132	-0.365415
carbachol	-0.365144
gliclazide	-0.365015
fadrozole	-0.362245
miglitol	-0.361592
NVP-BEZ235	-0.359359
trichostatin-a	-0.356059
etanidazole	-0.354131
idarubicin	-0.350163
sulbactam	-0.348894
clarithromycin	-0.346871
homoharringtonine	-0.345959
PIK-75	-0.345135
butamben	-0.34448
mitoxantrone	-0.344361
carbimazole	-0.343513
proscillaridin-a	-0.343369
OSI-027	-0.342809
vatalanib	-0.342759
closantel	-0.342043
nicorandil	-0.340713
cotinine	-0.340104
ponatinib	-0.338705
ZSTK-474	-0.337399
bortezomib	-0.337372
teniposide	-0.335393
sertindole	-0.334397
clofilium	-0.334162
lestaurtinib	-0.333713
tyloxapol	-0.332252
belinostat	-0.332202
sulfamethizole	-0.332103
CS-110266	-0.332036
bergenin	-0.33172
etoricoxib	-0.330646
sulfadoxine	-0.327915
propylthiouracil	-0.327126
metaxalone	-0.325764
fananserin	-0.324225
aminopurvalanol-a	-0.323116
bufexamac	-0.320147
troxipide	-0.318906
alvocidib	-0.318681
nornicotine	-0.318323
dactinomycin	-0.317408
busulfan	-0.317121
pelitinib	-0.31545
methotrexate	-0.309629
L-655240	-0.309577
latrunculin-b	-0.308885
oxytetracycline	-0.308772
guanethidine	-0.308273
GDC-0941	-0.308219
IKK-16	-0.307815
purvalanol-a	-0.307794
balsalazide	-0.307537
wortmannin	-0.307524
doramapimod	-0.307203
bromperidol	-0.306819
trichlormethiazide	-0.306244
doxorubicin	-0.305825
dequalinium	-0.304721
tigecycline	-0.304315
rolitetracycline	-0.303827
ZM-39923	-0.3032
ibrutinib	-0.3001
telenzepine	-0.299641
NVP-TAE684	-0.299195
hexetidine	-0.29798
topotecan	-0.297353
imiloxan	-0.297249
haloprogin	-0.296916
fursultiamine	-0.296804
ketoprofen	-0.296434
iniparib	-0.295872
levocetirizine	-0.295355
paromomycin	-0.295194
KI-16425	-0.295166
lanatoside-c	-0.295105
bisindolylmaleimide-ix	-0.294581
PD-123319	-0.293155
puromycin	-0.292658
tolnaftate	-0.292296
ryuvidine	-0.291397
vorinostat	-0.290587
enrofloxacin	-0.290001
monensin	-0.290001
pirarubicin	-0.289912
bethanechol	-0.289795
JNJ-7706621	-0.289208
levodopa	-0.288422
astemizole	-0.288372
cefepime	-0.288206
nadifloxacin	-0.287688
daunorubicin	-0.286254
irbesartan	-0.284756
mocetinostat	-0.284016
cantharidin	-0.281479
selumetinib	-0.281225
NNC-55-0396	-0.281184
CGS-15943	-0.281154
erlotinib	-0.281012
JTC-801	-0.280426
WAY-161503	-0.279979
PD-168077	-0.278596
levetiracetam	-0.278511
FR-139317	-0.278183
venlafaxine	-0.276532
cediranib	-0.276344
nisoldipine	-0.275446
olmesartan	-0.275149
U-0126	-0.275123
viomycin	-0.275121
everolimus	-0.275058
BMS-536924	-0.274905
acyclovir	-0.274845
PP-2	-0.274446
prednicarbate	-0.274222
cyanopindolol	-0.273741
mevastatin	-0.273611
nintedanib	-0.272402
BVT-948	-0.271617
BI-2536	-0.27083
DAU-5884	-0.27021
PD-184352	-0.269473
roxarsone	-0.268849
pitavastatin	-0.268349
flupentixol	-0.268282
givinostat	-0.268159
propranolol	-0.267811
sirolimus	-0.266873
rimcazole	-0.266855
oxidopamine	-0.266425
quinethazone	-0.266362
paroxetine	-0.265857
dyclonine	-0.265625
etoposide	-0.265563
CD-1530	-0.265243
clorgiline	-0.265229
sulfamethoxazole	-0.264998
streptozotocin	-0.264542
erythrosine	-0.262895
neratinib	-0.262751
carmofur	-0.262249
dacinostat	-0.262121
hexamethonium	-0.262045
RS-39604	-0.26152
YM-155	-0.260974
PI-103	-0.260844
BX-912	-0.260769
BIBU-1361	-0.260163
sulfaguanidine	-0.260038
prednisone	-0.259621
PD-198306	-0.259331
dasatinib	-0.259251
fluvastatin	-0.25852
viloxazine	-0.258309
gemcitabine	-0.25823
nifuroxazide	-0.258154
AT7867	-0.257837
tegaserod	-0.257424
amsacrine	-0.25738
anethole	-0.256852
rifabutin	-0.256775
tioguanine	-0.25648
CGP-71683	-0.256272
digitoxigenin	-0.256242
ethosuximide	-0.255817
chlorhexidine	-0.255513
temsirolimus	-0.255148
ataluren	-0.254364
idazoxan	-0.254279
reversine	-0.25376
alexidine	-0.25361
tyrphostin-AG-1478	-0.253121
minocycline	-0.253069
PHA-793887	-0.252265
Y-27152	-0.252231
clopidogrel	-0.25213
nortriptyline	-0.252111
TG-101348	-0.251988
levalbuterol	-0.251198
IBC-293	-0.250745
roxithromycin	-0.250699
scriptaid	-0.250548
WZ-3146	-0.250405
pizotifen	-0.25008
