# Supplementary material for: Network neighborhood operates as a drug repositioning method for cancer treatment
Source: PeerJ. 2023 Jul 10;11:e15624. doi: 10.7717/peerj.15624 (PMC10340098; doi:10.7717/peerj.15624)
Supplement: Supplemental Information 10 — The performance of OCTAD is given in the sRGES column that should be -0.25 or lower for significant results. [file peerj-11-15624-s010.xlsx]

## Sheet: OCTAD-Prostate-cancer
Drug name	sRGES
peruvoside	-0.816112
actinomycin-d	-0.713173
BMS-387032	-0.679285
PIK-75	-0.676548
camptothecin	-0.652522
amifostine	-0.641903
dabrafenib	-0.640103
triptolide	-0.637798
levocetirizine	-0.626717
bimatoprost	-0.624328
idarubicin	-0.614638
teniposide	-0.605545
rolitetracycline	-0.604506
alvocidib	-0.603108
dactinomycin	-0.599853
mitoxantrone	-0.591517
SN-38	-0.586103
targinine	-0.58512
panobinostat	-0.584899
clarithromycin	-0.57722
bufexamac	-0.568615
WYE-125132	-0.56813
dyphylline	-0.566883
doxorubicin	-0.563753
imiloxan	-0.562135
methotrexate	-0.558603
thonzonium	-0.556475
luteolin	-0.555431
trichostatin-a	-0.553643
sertindole	-0.552551
etanidazole	-0.540779
NVP-BEZ235	-0.539072
daunorubicin	-0.537951
lestaurtinib	-0.533932
WAY-161503	-0.532184
pirarubicin	-0.527653
bisindolylmaleimide-ix	-0.525126
miglitol	-0.524376
torin-1	-0.515681
ibrutinib	-0.512746
alexidine	-0.511493
gemcitabine	-0.510958
AT7867	-0.508603
pizotifen	-0.50819
RX-821002	-0.507967
acetylcholine	-0.50686
JNJ-7706621	-0.505103
mocetinostat	-0.501411
AT-7519	-0.500646
aminopurvalanol-a	-0.500429
purvalanol-a	-0.500201
homoharringtonine	-0.498321
ponatinib	-0.496487
bortezomib	-0.490357
ataluren	-0.489581
gliclazide	-0.489044
buparlisib	-0.487284
belinostat	-0.485912
nadifloxacin	-0.480504
latrunculin-b	-0.478133
haloprogin	-0.476902
PHA-793887	-0.476192
clofilium	-0.475383
JTC-801	-0.475245
chloramphenicol	-0.47478
torin-2	-0.474496
astemizole	-0.474234
troxipide	-0.47417
sulconazole	-0.470692
balsalazide	-0.470551
nintedanib	-0.468506
amsacrine	-0.467304
carbimazole	-0.466598
epirubicin	-0.465282
topotecan	-0.463962
puromycin	-0.460477
dasatinib	-0.4602
roxarsone	-0.458754
mepivacaine	-0.457738
IKK-16	-0.457411
ATPA	-0.456108
ZSTK-474	-0.455884
hycanthone	-0.45544
papaverine	-0.455085
pyrvinium-pamoate	-0.454031
ciprofibrate	-0.452953
tigecycline	-0.452774
ZM-39923	-0.452759
hexylresorcinol	-0.452305
ER-27319	-0.451268
OSI-027	-0.450182
YM-155	-0.447118
propylthiouracil	-0.446925
felbinac	-0.443987
carmofur	-0.442627
trichlormethiazide	-0.441937
vorinostat	-0.439959
PI-828	-0.437026
etoposide	-0.436229
orlistat	-0.435653
pyrvinium	-0.43564
lofepramine	-0.434613
BIBU-1361	-0.433282
acyclovir	-0.432108
nifenazone	-0.431886
tolmetin	-0.431661
strychnine	-0.431487
GDC-0941	-0.430568
aceclidine	-0.430463
monensin	-0.429512
cefuroxime	-0.428231
tioguanine	-0.428046
bromfenac	-0.427767
darifenacin	-0.427345
tacrine	-0.426579
BX-912	-0.425858
streptozotocin	-0.425048
wortmannin	-0.424947
bergenin	-0.42416
oxolamine	-0.423905
sulfathiazole	-0.419231
fursultiamine	-0.418892
BVT-948	-0.417696
nicorandil	-0.417571
palbociclib	-0.417061
fludarabine	-0.416884
sulfamethizole	-0.415454
bromperidol	-0.414261
flupentixol	-0.413065
thiethylperazine	-0.412676
cotinine	-0.411868
citiolone	-0.411602
QX-222	-0.411505
prednicarbate	-0.410376
MG-132	-0.407101
NSC-3852	-0.406982
entinostat	-0.40651
tacedinaline	-0.406279
clorgiline	-0.405395
busulfan	-0.40533
pitavastatin	-0.405193
PD-168077	-0.404587
RS-39604	-0.404052
tanespimycin	-0.403557
pyrithyldione	-0.403367
paroxetine	-0.402402
etofenamate	-0.401025
viloxazine	-0.399301
GR-103691	-0.399004
raloxifene	-0.398762
L-655240	-0.398386
dequalinium	-0.397921
CS-110266	-0.397891
saclofen	-0.394899
tegaserod	-0.394797
amitriptyline	-0.394796
ryuvidine	-0.394756
olmesartan	-0.393156
granisetron	-0.393133
scriptaid	-0.392964
nortriptyline	-0.391139
sulbactam	-0.390564
methylene-blue	-0.389117
sulfaguanidine	-0.388125
oleanolic-acid	-0.38764
miconazole	-0.386489
nisoldipine	-0.385225
INCA-6	-0.38487
givinostat	-0.384547
homosalate	-0.384483
RS-17053	-0.384407
tangeritin	-0.380527
oxiconazole	-0.380343
iniparib	-0.379924
latamoxef	-0.378149
levalbuterol	-0.378077
ketoprofen	-0.377044
fluspirilene	-0.375725
tolnaftate	-0.374236
saquinavir	-0.374
piretanide	-0.37387
andarine	-0.373439
moclobemide	-0.373303
pelitinib	-0.372996
acemetacin	-0.372476
BIBX-1382	-0.372083
florfenicol	-0.371917
H-89	-0.37152
erythrosine	-0.370104
CD-437	-0.36975
melphalan	-0.368979
metitepine	-0.368833
lanatoside-c	-0.368743
PSB-1115	-0.36868
mycophenolic-acid	-0.368282
vatalanib	-0.36773
diflunisal	-0.367408
1-phenylbiguanide	-0.367196
dirithromycin	-0.366347
metronidazole	-0.364941
triflupromazine	-0.363765
SB-258585	-0.363763
thiomersal	-0.363637
fluvastatin	-0.363083
rebamipide	-0.362852
etidronic-acid	-0.362198
pipemidic-acid	-0.362178
thiothixene	-0.36206
anisomycin	-0.362056
gefitinib	-0.361941
fananserin	-0.361821
auranofin	-0.361212
sirolimus	-0.360818
remoxipride	-0.36068
GR-127935	-0.360222
tribenoside	-0.357984
rivastigmine	-0.35732
cilostamide	-0.356484
dipivefrine	-0.355887
dacinostat	-0.355258
tubastatin-a	-0.354774
PI-103	-0.353907
CYT-997	-0.352504
cefepime	-0.351548
WAY-170523	-0.35135
erlotinib	-0.351061
cladribine	-0.350506
doramapimod	-0.349849
carbarsone	-0.349066
TGX-221	-0.348752
amonafide	-0.346529
emetine	-0.345344
neratinib	-0.344937
parbendazole	-0.344409
SRC-kinase-inhibitor-I	-0.344325
Y-134	-0.344302
SKF-83566	-0.341912
temsirolimus	-0.341818
GR-159897	-0.3418
tyloxapol	-0.340837
selumetinib	-0.340754
mibefradil	-0.339598
KB-R7943	-0.339588
enrofloxacin	-0.339168
penfluridol	-0.338858
zalcitabine	-0.338084
geldanamycin	-0.337967
ketoconazole	-0.336893
trametinib	-0.335837
acetylcysteine	-0.335643
flucytosine	-0.335627
NVP-TAE684	-0.334621
KN-93	-0.334582
ivermectin	-0.332485
CV-1808	-0.33227
L-168049	-0.331885
ampicillin	-0.331811
eliprodil	-0.331153
tiaprofenic-acid	-0.331029
5-hydroxytryptophan	-0.330955
venlafaxine	-0.330759
NNC-05-2090	-0.328517
pipamperone	-0.327218
chlorphenamine	-0.327111
ticlopidine	-0.325561
MK-2206	-0.32552
guanethidine	-0.324815
estradiol-valerate	-0.323903
prenylamine	-0.323529
ZM-447439	-0.322591
CGP-71683	-0.321624
KI-16425	-0.321375
calcipotriol	-0.3213
canrenone	-0.321199
nicotinamide	-0.320846
fluvoxamine	-0.320494
indinavir	-0.320462
cyanopindolol	-0.319563
levonorgestrel	-0.319141
tyrphostin-AG-1296	-0.319137
ranolazine	-0.318954
metaxalone	-0.317402
meglumine	-0.316816
BIIB021	-0.316766
medetomidine	-0.316684
NSC-663284	-0.315983
hexamethonium	-0.315978
icosapent	-0.315884
selegiline	-0.314888
butamben	-0.314695
SU-4312	-0.314209
ZD-7155	-0.314062
metergoline	-0.314017
IKK-2-inhibitor-V	-0.313471
U-18666A	-0.313246
CFM-1571	-0.313225
methenamine	-0.312823
OSI-930	-0.312636
fosfosal	-0.312276
everolimus	-0.311757
AMG-9810	-0.311559
mitomycin-c	-0.310855
nornicotine	-0.310589
Y-39983	-0.310153
nilotinib	-0.309973
nefazodone	-0.309955
cytarabine	-0.309755
CD-1530	-0.30902
DH-97	-0.308312
BIX-02189	-0.30795
cisplatin	-0.307885
idazoxan	-0.307804
simvastatin	-0.307483
niclosamide	-0.3073
rimcazole	-0.30686
saracatinib	-0.305604
roxithromycin	-0.30517
levofloxacin	-0.305034
U-0126	-0.304627
aminocaproic-acid	-0.304423
floxuridine	-0.304106
CCMQ	-0.30408
mevastatin	-0.304058
alvespimycin	-0.30373
CGS-15943	-0.30359
GDC-0879	-0.303568
azaperone	-0.302953
thiostrepton	-0.302617
chlorhexidine	-0.302425
trimethadione	-0.301717
azelastine	-0.301559
rimonabant	-0.301351
NVP-BGJ398	-0.301295
UBP-302	-0.301187
thiocolchicoside	-0.301128
NNC-55-0396	-0.301074
nifuroxazide	-0.30097
bifemelane	-0.300944
esmolol	-0.300375
mesalazine	-0.300125
remacemide	-0.299875
foretinib	-0.299736
relcovaptan	-0.298804
BNTX	-0.298649
DAU-5884	-0.298407
heptaminol	-0.298327
levetiracetam	-0.298319
trapidil	-0.298233
naltrindole	-0.298003
amperozide	-0.29786
econazole	-0.296996
serdemetan	-0.296979
cyproheptadine	-0.296938
pyroxamide	-0.295947
perhexiline	-0.29542
prednisone	-0.295187
JNJ-38877605	-0.295138
DPO-1	-0.295096
fipronil	-0.29463
olanzapine	-0.293801
TW-37	-0.293358
PP242	-0.29231
chlorprothixene	-0.292143
AG-14361	-0.291291
tyrphostin-A9	-0.290694
NVP-AUY922	-0.289679
morin	-0.289472
cisapride	-0.28947
butacaine	-0.289351
clofarabine	-0.289287
mepacrine	-0.288936
enilconazole	-0.288358
semaxanib	-0.287156
JTE-013	-0.286619
ZK-93423	-0.286062
afatinib	-0.285446
canertinib	-0.285387
L-161982	-0.285089
halofantrine	-0.283911
pyrazolanthrone	-0.283884
PD-123319	-0.283463
ezetimibe	-0.283242
gatifloxacin	-0.282842
azacitidine	-0.282757
PP-2	-0.282467
PETCM	-0.281949
edrophonium	-0.281582
cediranib	-0.281468
clopidogrel	-0.281055
irinotecan	-0.280877
PF-562271	-0.280635
tosedostat	-0.280234
PD-102807	-0.279793
hexetidine	-0.279645
BIX-01294	-0.278314
dantron	-0.278195
antimycin-a	-0.27729
clemastine	-0.276619
toremifene	-0.276579
TG-101348	-0.276345
XL-147	-0.276283
ABT-737	-0.276161
phloretin	-0.275783
digitoxigenin	-0.27574
nizatidine	-0.275684
moroxydine	-0.274917
imatinib	-0.274869
BMS-536924	-0.27477
gavestinel	-0.274135
esculin	-0.273916
fluoxetine	-0.273775
ethosuximide	-0.273761
selamectin	-0.273097
SNS-314	-0.273028
MDL-29951	-0.272802
PD-198306	-0.272709
reversine	-0.27251
lobendazole	-0.271315
trifluridine	-0.271083
BD-1063	-0.270164
novobiocin	-0.27002
dilazep	-0.269791
nonoxynol-9	-0.26887
leflunomide	-0.268563
digitoxin	-0.26849
PD-184352	-0.268159
sulfachlorpyridazine	-0.267496
rifabutin	-0.266171
NTNCB	-0.266063
Y-27632	-0.266005
gamma-linolenic-acid	-0.265812
BI-2536	-0.265263
chlorpromazine	-0.265209
foxy-5	-0.264955
SDZ-WAG-994	-0.263997
T-0901317	-0.263805
fadrozole	-0.263275
menadione	-0.262972
desoximetasone	-0.262801
tamoxifen	-0.26259
mecamylamine	-0.262484
terbinafine	-0.261559
PQ-401	-0.261274
AZ-628	-0.260366
diphenylpyraline	-0.259758
cytochalasin-b	-0.259276
fulvestrant	-0.258577
WYE-354	-0.258447
PSB-06126	-0.258301
kanamycin	-0.257848
acamprosate	-0.257833
2-aminobenzenesulfonamide	-0.25758
Y-26763	-0.25718
pentobarbital	-0.257109
licochalcone-a	-0.256316
oxidopamine	-0.256014
picotamide	-0.25596
cyclophosphamide	-0.255634
varenicline	-0.255566
lylamine	-0.255526
zidovudine	-0.254782
trap-101	-0.254187
genistein	-0.254139
danusertib	-0.252027
AM-281	-0.251653
fenofibrate	-0.251463
mefexamide	-0.250999
fendiline	-0.250837
calcifediol	-0.250803
piromidic-acid	-0.250418
desipramine	-0.250417
