# Supplementary material for: Network neighborhood operates as a drug repositioning method for cancer treatment
Source: PeerJ. 2023 Jul 10;11:e15624. doi: 10.7717/peerj.15624 (PMC10340098; doi:10.7717/peerj.15624)
Supplement: Supplemental Information 11 — In addition to AUC value, the F1.score, precision and recall values are provided. [file peerj-11-15624-s011.xlsx]

## Sheet: Adamic-Adar-2
Drugs	Combined.AUC	Combined.Precision	Combined.Recall	Combined.F1
PHA-793887	0.635071	0.118669	0.628474	0.179799
gefitinib	0.626578	0.169379	0.616019	0.236628
Nelarabine	0.622222	0.196898	0.607526	0.260416
pterostilbene	0.616636	0.195044	0.601536	0.257078
bx-795	0.612736	0.15798	0.604218	0.222006
Y-39983	0.610893	0.216644	0.593914	0.270798
gefitinib	0.610854	0.215653	0.597173	0.280225
enoxolone	0.610294	0.137376	0.603926	0.20187
alisertib	0.606726	0.201448	0.593475	0.261205
AT-7519	0.601068	0.23978	0.583683	0.286048
ZM-447439	0.598635	0.275194	0.580564	0.312071
KIN001-244	0.597546	0.196755	0.585256	0.258754

## Sheet: PageRank-2
Drugs	Combined.AUC	Combined.Precision	Combined.Recall	Combined.F1
AT-7519	0.613891	0.259882	0.608927	0.31001
Dabrafenib	0.604396	0.151614	0.596685	0.218415
cytarabine	0.604087	0.18593	0.596382	0.254936
Alectinib	0.602724	0.135827	0.598953	0.201288
Dasatinib	0.600765	0.108725	0.597049	0.16856
Y-39983	0.597501	0.223738	0.598248	0.281041

## Sheet: Neighborhood-Scoring
Drugs	Combined.AUC	Combined.Precision	Combined.Recall	Combined.F1
gsk-1904529a	0.66479	0.0676822	0.663955	0.110163
KIN001-266	0.651458	0.0474503	0.65194	0.0808427
Pilaralisib	0.624113	0.0481252	0.625213	0.0866229
quercetin	0.624011	0.0960776	0.621209	0.153481
Leflunomide	0.623073	0.0538232	0.623564	0.0927616
LDN-193189	0.618461	0.0392728	0.62189	0.0768979
sorafenib	0.611488	0.0647571	0.611701	0.110699
tozasertib	0.609358	0.0659328	0.61016	0.10929
zstk-474	0.60897	0.0606584	0.610163	0.104078
amsacrine	0.605912	0.0687332	0.605695	0.113412
Taselisib	0.603444	0.109989	0.599614	0.16571
Venetoclax	0.601002	0.0548321	0.603074	0.0933665
gemcitabine	0.600041	0.0994601	0.596994	0.1551
apabetalone	0.599249	0.0794128	0.59877	0.129258
Quizartinib	0.596846	0.0525777	0.598642	0.0919657
pazopanib	0.596752	0.0507164	0.599593	0.0914052
SB-590885	0.595277	0.117668	0.588586	0.172376
