# Supplementary material for: Network neighborhood operates as a drug repositioning method for cancer treatment
Source: PeerJ. 2023 Jul 10;11:e15624. doi: 10.7717/peerj.15624 (PMC10340098; doi:10.7717/peerj.15624)
Supplement: Supplemental Information 12 — In addition to AUC value, the F1.score, precision and recall values are provided. [file peerj-11-15624-s012.xlsx]

## Sheet: Adamic-Adar-2
Drugs	Combined.AUC	Combined.Precision	Combined.Recall	Combined.F1
Tamoxifen	0.806897	0.0151229	0.81146	0.0335287
Phenformin	0.697207	0.0156044	0.703254	0.0333907
naftopidil	0.632027	0.0460002	0.634376	0.0820363
gsk-1904529a	0.631878	0.0373375	0.63382	0.0697247
QL-XII-47	0.622422	0.0390086	0.624924	0.0695314
NVP-BEZ235	0.61516	0.0978014	0.604025	0.137517
tretinoin	0.613539	0.122825	0.598061	0.166469
vorinostat	0.613033	0.106018	0.599578	0.143452
NVP-TAE226	0.606449	0.083937	0.601598	0.131554
AZD-7762	0.602938	0.11522	0.586938	0.158213
ACY-1215	0.599655	0.110831	0.588809	0.154815
JW-7-24-1	0.598486	0.116373	0.584337	0.15918
palbociclib	0.598281	0.0766945	0.59306	0.128547

## Sheet: PageRank-2
Drugs	Combined.AUC	Combined.Precision	Combined.Recall	Combined.F1
gsk-1904529a	0.698258	0.044928	0.700476	0.0867292
ACY-1215	0.682157	0.134796	0.656709	0.185839
NVP-BEZ235	0.635866	0.111068	0.633721	0.156012
GSK-690693	0.635253	0.0881926	0.631712	0.145314
Rucaparib	0.630216	0.0414235	0.634419	0.0869684
Linsitinib	0.624395	0.0500436	0.625949	0.0884981
MG-132	0.620653	0.174483	0.624039	0.209243
AGI-5198	0.616368	0.0612509	0.616552	0.107297
serdemetan	0.615722	0.0198909	0.621493	0.0417421
TAK-715	0.6157	0.0627107	0.615425	0.108612
NVP-BEZ235	0.609785	0.0999963	0.609033	0.145188
entinostat	0.601722	0.142815	0.596524	0.181711
azd-6482	0.60033	0.048953	0.600018	0.0905733
Voxtalisib	0.598587	0.12837	0.597079	0.17332

## Sheet: Neighborhood-Scoring
Drugs	Combined.AUC	Combined.Precision	Combined.Recall	Combined.F1
Phenformin	0.68571	0.0155649	0.690887	0.0341735
docetaxel	0.651263	0.0470701	0.651624	0.0801225
QL-XII-47	0.639827	0.0364175	0.64386	0.0684834
gsk-2126458	0.635261	0.0519438	0.631884	0.0834728
NU-7441	0.628024	0.0600834	0.622982	0.0950673
irinotecan	0.626566	0.0242359	0.632438	0.0491516
gsk-1904529a	0.625151	0.0391924	0.627309	0.0691116
gemcitabine	0.623442	0.0546683	0.621947	0.0883939
ciprofloxacin	0.619242	0.0411071	0.621396	0.0729833
PHA-793887	0.613033	0.0340063	0.615252	0.060093
etoposide	0.611018	0.032305	0.614817	0.0584177
unc-1215	0.608572	0.0231444	0.613002	0.049148
OSI-027	0.604291	0.0511064	0.60544	0.0854294
Linsitinib	0.596427	0.0484389	0.59907	0.0842099
