# Supplementary material for: Network neighborhood operates as a drug repositioning method for cancer treatment
Source: PeerJ. 2023 Jul 10;11:e15624. doi: 10.7717/peerj.15624 (PMC10340098; doi:10.7717/peerj.15624)
Supplement: Supplemental Information 14 — The performance of OCTAD is given in the sRGES column that should be -0.25 or lower for significant results. [file peerj-11-15624-s014.xlsx]

## Sheet: OCTAD - Melanoma
Drug name	sRGES
novobiocin	-1.4021
thonzonium	-1.28206
ciclopirox	-1.27089
minocycline	-1.27035
monensin	-1.26789
SN-38	-1.22196
cladribine	-1.1982
BVT-948	-1.19797
YM-155	-1.19309
ivermectin	-1.18698
CD-437	-1.18082
closantel	-1.16667
tioguanine	-1.15707
teniposide	-1.14624
tyrphostin-A9	-1.13858
homoharringtonine	-1.12629
haloprogin	-1.12369
trichlormethiazide	-1.11846
amsacrine	-1.09859
benzethonium	-1.09655
tyloxapol	-1.09497
nifuroxazide	-1.09477
clofarabine	-1.08579
pyrvinium-pamoate	-1.08379
bortezomib	-1.08342
camptothecin	-1.08234
puromycin	-1.06945
tegaserod	-1.0605
chlorhexidine	-1.05557
vatalanib	-1.0546
CGK-733	-1.0494
quiflapon	-1.04316
thiomersal	-1.04014
methotrexate	-1.03956
obatoclax	-1.03532
monobenzone	-1.03459
peruvoside	-1.02879
TW-37	-1.02877
MG-132	-1.0281
irinotecan	-1.0243
NSC-663284	-1.0217
niclosamide	-1.01736
selamectin	-1.01582
JTC-801	-1.01369
oxyphenbutazone	-1.01358
trichostatin-a	-1.00838
IKK-2-inhibitor-V	-1.006
cytarabine	-0.999532
anisomycin	-0.998552
levobunolol	-0.996524
CGP-71683	-0.996467
nisoldipine	-0.996147
miglitol	-0.984049
panobinostat	-0.981683
melphalan	-0.979766
arbutin	-0.975105
chloroxine	-0.971255
gemcitabine	-0.968235
emedastine	-0.967948
morin	-0.967714
trifluridine	-0.964673
IKK-16	-0.957495
purvalanol-a	-0.947621
tyrphostin-AG-1478	-0.94687
ryuvidine	-0.944322
epiandrosterone	-0.940749
NSC-3852	-0.934535
purvalanol-b	-0.934485
arctigenin	-0.929327
tenatoprazole	-0.926176
pentamidine	-0.926042
etoposide	-0.924057
CCMQ	-0.921908
BMY-45778	-0.918935
acemetacin	-0.9182
ethosuximide	-0.916973
suprofen	-0.913755
GW-405833	-0.911171
ciprofibrate	-0.909461
pyrvinium	-0.906633
mercaptopurine	-0.904103
azacitidine	-0.902277
mycophenolic-acid	-0.901559
givinostat	-0.891859
PAC-1	-0.890478
vorinostat	-0.886271
saclofen	-0.88533
scriptaid	-0.883247
imiloxan	-0.882262
CD-1530	-0.876501
CGP-53353	-0.872405
viomycin	-0.866925
hexetidine	-0.865698
ZK-93423	-0.865521
idarubicin	-0.863253
alverine	-0.862631
chlorcyclizine	-0.861759
NSC-632839	-0.861568
SB-221284	-0.859918
floxuridine	-0.855153
methylene-blue	-0.843478
hexamethonium	-0.842945
tosedostat	-0.842738
disulfiram	-0.841688
cerulenin	-0.839516
entinostat	-0.8319
dyclonine	-0.831138
calcipotriol	-0.829861
bromperidol	-0.829195
BIBR-1532	-0.824572
thiostrepton	-0.822723
levalbuterol	-0.81989
salubrinal	-0.819334
rebamipide	-0.817436
PD-198306	-0.811856
loteprednol	-0.807682
JTE-907	-0.804085
belinostat	-0.802895
mitoxantrone	-0.801712
etomidate	-0.800334
limonin	-0.796933
topotecan	-0.79587
carmofur	-0.791834
ethaverine	-0.790407
iopromide	-0.783285
viloxazine	-0.781853
chlorambucil	-0.779863
emetine	-0.779441
GR-127935	-0.779142
nitazoxanide	-0.777294
chlorotrianisene	-0.776954
BNTX	-0.776563
CGS-15943	-0.773567
brefeldin-a	-0.770176
CNQX	-0.769584
bithionol	-0.768821
mycophenolate-mofetil	-0.768107
felbinac	-0.767539
phenytoin	-0.766925
reserpine	-0.765968
INCA-6	-0.765346
palbociclib	-0.761378
iopamidol	-0.759972
pyrimethamine	-0.758665
penfluridol	-0.754176
ZK-164015	-0.752537
sertindole	-0.750734
milnacipran	-0.750436
cyproheptadine	-0.747338
tigecycline	-0.744422
rimexolone	-0.743969
darifenacin	-0.739522
droxinostat	-0.739244
nonoxynol-9	-0.737468
astemizole	-0.735737
mitomycin-c	-0.734879
tyrphostin-AG-835	-0.734652
ZM-336372	-0.732254
QX-222	-0.73216
mocetinostat	-0.731932
pirlindole	-0.730897
dabrafenib	-0.730551
adapalene	-0.727607
cloxacillin	-0.726994
valdecoxib	-0.724957
cytochalasin-b	-0.722402
LE-135	-0.716177
gossypol	-0.712919
NVP-BEZ235	-0.712709
lacidipine	-0.710022
M-344	-0.709434
phloretin	-0.709072
lorglumide	-0.708234
exemestane	-0.705821
KI-8751	-0.704973
NNC-55-0396	-0.703869
florfenicol	-0.700463
miconazole	-0.700222
menadione	-0.696651
papaverine	-0.695706
nobiletin	-0.695405
spiperone	-0.692867
luteolin	-0.691295
diphencyprone	-0.689609
pyrrolidine-dithiocarbamate	-0.688266
hycanthone	-0.687475
KN-93	-0.685834
clofilium	-0.68434
CI-976	-0.681788
digitoxigenin	-0.680512
aripiprazole	-0.679493
linezolid	-0.677807
PD-158780	-0.669484
pterostilbene	-0.668852
cyclosporin-a	-0.668229
capsazepine	-0.66795
sulconazole	-0.666514
alfacalcidol	-0.665298
lofepramine	-0.663685
triclosan	-0.660453
ataluren	-0.658896
BIBU-1361	-0.658441
PHA-665752	-0.657372
CO-101244	-0.65064
artemisinin	-0.648595
homosalate	-0.648544
triamterene	-0.647584
tubastatin-a	-0.645621
mesalazine	-0.642869
triciribine	-0.642579
pyroxamide	-0.640687
meglumine	-0.637273
sulfathiazole	-0.635992
diacerein	-0.635712
serdemetan	-0.633941
diphenyleneiodonium	-0.63202
WAY-170523	-0.631927
moxisylyte	-0.631701
lonidamine	-0.630864
amonafide	-0.629642
dilazep	-0.629003
betahistine	-0.628759
mometasone	-0.628203
suloctidil	-0.625454
AM-404	-0.624742
vanoxerine	-0.624739
BIX-02189	-0.621654
erlotinib	-0.620899
tyrphostin-AG-494	-0.618331
enalaprilat	-0.617334
TNP-470	-0.617314
daidzein	-0.613115
oligomycin-a	-0.611843
antimycin-a	-0.611396
digitoxin	-0.607758
bimatoprost	-0.602685
digoxin	-0.599872
alexidine	-0.599457
dacinostat	-0.597953
iniparib	-0.597825
fexofenadine	-0.594826
FGIN-1-43	-0.59351
glycopyrrolate	-0.593181
wortmannin	-0.592855
perhexiline	-0.592851
piceatannol	-0.591768
oxiconazole	-0.587945
auranofin	-0.586877
tacedinaline	-0.584666
tiaprofenic-acid	-0.583267
artesunate	-0.581574
calcifediol	-0.580103
budesonide	-0.579802
SB-590885	-0.579626
talniflumate	-0.578208
cycloheximide	-0.578028
aminopurvalanol-a	-0.577225
tiratricol	-0.57546
sparfloxacin	-0.57306
parthenolide	-0.570148
RS-504393	-0.568342
ouabain	-0.566541
phenoxybenzamine	-0.566395
cefsulodin	-0.565903
cyclopiazonic-acid	-0.564429
sorafenib	-0.56404
CMPD-1	-0.563322
XL-147	-0.561632
zalcitabine	-0.560074
metrizamide	-0.558718
lanatoside-c	-0.557827
fluvastatin	-0.557342
masitinib	-0.556602
PD-173074	-0.555762
WYE-125132	-0.552983
nTZDpa	-0.550727
quizartinib	-0.550611
primaquine	-0.548507
PHA-793887	-0.546115
ZM-39923	-0.54494
pantoprazole	-0.544122
dequalinium	-0.542536
PX-12	-0.541805
embelin	-0.540577
tacrine	-0.539495
loratadine	-0.539236
neratinib	-0.53696
SC-9	-0.535805
lasalocid	-0.534206
MRS-1220	-0.533277
azelastine	-0.532876
ganciclovir	-0.531035
proscillaridin-a	-0.530139
epinephrine	-0.529837
mephenesin	-0.527123
medrysone	-0.527018
latrepirdine	-0.522617
SB-218078	-0.521593
troxipide	-0.520579
torin-1	-0.52012
vidarabine	-0.518859
SB-408124	-0.517865
cilnidipine	-0.517369
econazole	-0.516961
AG-490	-0.516021
triclabendazole	-0.510175
SR-27897	-0.509598
capsaicin	-0.506419
prednicarbate	-0.505414
ethotoin	-0.505102
ifosfamide	-0.504962
stanozolol	-0.502508
pentoxifylline	-0.500724
Y-134	-0.500707
flumetasone	-0.499834
doxorubicin	-0.496429
roscovitine	-0.493974
ML-9	-0.493023
GW-311616	-0.492665
fenretinide	-0.492028
SANT-1	-0.491949
ursolic-acid	-0.490271
SGX523	-0.490061
BMS-345541	-0.486299
terfenadine	-0.484834
thiethylperazine	-0.484401
PNU-74654	-0.48221
fipronil	-0.48205
caffeic-acid-phenethyl-ester	-0.48128
GW-0742	-0.481136
mitotane	-0.478989
clotrimazole	-0.478345
everolimus	-0.477702
L-168049	-0.476443
tamibarotene	-0.474814
digoxigenin	-0.474667
indirubin	-0.474565
altrenogest	-0.474518
gefitinib	-0.474273
famciclovir	-0.473774
cefadroxil	-0.472317
elesclomol	-0.471984
triamcinolone	-0.471662
MGCD-265	-0.471334
PP242	-0.471305
arcyriaflavin-a	-0.469601
ketoconazole	-0.468209
phenethyl-isothiocyanate	-0.465398
DR-2313	-0.465384
MK-2206	-0.463965
raloxifene	-0.463945
daunorubicin	-0.462901
BAX-channel-blocker	-0.461269
targinine	-0.461199
adrenosterone	-0.458745
betamethasone	-0.458492
YM-90709	-0.457731
BIX-01294	-0.457165
mifepristone	-0.455456
NO-ASA	-0.455378
PF-562271	-0.453918
terbinafine	-0.453615
sertaconazole	-0.451148
RS-17053	-0.448468
MR-16728	-0.447874
cinchocaine	-0.446421
theophylline	-0.446373
GSK-3-inhibitor-IX	-0.446115
hexachlorophene	-0.44403
GS-39783	-0.443338
chlortetracycline	-0.442639
quercetin	-0.442004
bromocriptine	-0.44159
nelfinavir	-0.440862
tosufloxacin	-0.439709
actinomycin-d	-0.438736
benzoxiquine	-0.437731
GGTI-298	-0.437477
clomipramine	-0.437263
SKF-86002	-0.436032
RS-102895	-0.435752
brompheniramine	-0.435074
CYT-997	-0.434799
vemurafenib	-0.432352
metaraminol	-0.431827
JLK-6	-0.431525
caffeic-acid	-0.430247
naftidrofuryl	-0.430216
meclofenamic-acid	-0.42913
BW-723C86	-0.428559
zafirlukast	-0.427012
thioridazine	-0.426799
BI-2536	-0.425916
YM-201636	-0.424605
dyphylline	-0.423934
oxolamine	-0.423517
FR-180204	-0.423184
amperozide	-0.423182
AM-281	-0.42242
2-aminobenzenesulfonamide	-0.42122
Pevonedistat (MLN-4924)	-0.419916
tetroquinone	-0.41833
NNC-05-2090	-0.417505
pazopanib	-0.416864
tacrolimus	-0.415879
pimozide	-0.415771
ZK-93426	-0.412381
OMDM-2	-0.411818
ZSTK-474	-0.411107
pyrazolanthrone	-0.410737
mesulergine	-0.410252
olaparib	-0.409358
oxymetholone	-0.407151
mefexamide	-0.406929
mepacrine	-0.406322
OSI-930	-0.404957
bendroflumethiazide	-0.404318
desloratadine	-0.403912
fulvestrant	-0.403692
PCA-4248	-0.403182
efavirenz	-0.402825
AT7867	-0.400366
AZ-628	-0.398746
SEW-2871	-0.397853
donepezil	-0.396925
streptozotocin	-0.394608
vinblastine	-0.394209
idoxuridine	-0.39361
cinacalcet	-0.39361
amthamine	-0.393396
motesanib	-0.389253
nifekalant	-0.388806
torin-2	-0.386834
metoclopramide	-0.386682
tofacitinib	-0.386632
erythrosine	-0.386581
pirenzepine	-0.383676
BX-795	-0.383003
JNJ-7706621	-0.382692
enilconazole	-0.381853
entacapone	-0.381563
nutlin-3	-0.381453
bisindolylmaleimide-ix	-0.381339
calcitriol	-0.379209
BMS-777607	-0.378331
venlafaxine	-0.378261
amlodipine	-0.377095
cotinine	-0.376892
terconazole	-0.376765
L-755507	-0.376192
BML-284	-0.375154
resveratrol	-0.372064
trazodone	-0.369761
sirolimus	-0.369308
dovitinib	-0.366521
SKF-81297	-0.366518
OSI-027	-0.365952
pirarubicin	-0.364642
AG-14361	-0.364305
PF-3845	-0.364271
mibefradil	-0.363673
AT-7519	-0.363152
rimonabant	-0.362749
BIBX-1382	-0.361994
doxapram	-0.361522
butein	-0.356374
lomerizine	-0.355846
theobromine	-0.354219
KN-62	-0.352552
afatinib	-0.351525
roquinimex	-0.351343
zonisamide	-0.35128
KU-60019	-0.349272
valaciclovir	-0.34912
HA-14-1	-0.347394
AMG-9810	-0.346579
lylamine	-0.346127
coumarin	-0.343752
indatraline	-0.343336
tetracycline	-0.34269
flunisolide	-0.341803
NVP-AEW541	-0.341449
GR-159897	-0.338947
genistein	-0.338511
clarithromycin	-0.337273
benidipine	-0.337041
naftopidil	-0.335779
metergoline	-0.335541
PI-828	-0.335519
GDC-0879	-0.334662
orlistat	-0.333794
ditolylguanidine	-0.332924
alvespimycin	-0.332793
AM-92016	-0.331383
deflazacort	-0.331342
fludarabine	-0.330875
dihydroergocristine	-0.330491
desoximetasone	-0.330293
PLX-4720	-0.330145
temefos	-0.329721
procaterol	-0.329704
rifabutin	-0.32892
necrostatin-1	-0.328253
WZ-4002	-0.326966
chicago-sky-blue-6b	-0.326262
methylprednisolone	-0.324501
rosmarinic-acid	-0.32406
canrenone	-0.322958
levofloxacin	-0.322854
DCEBIO	-0.322377
chenodeoxycholic-acid	-0.322113
flunarizine	-0.32185
toremifene	-0.321777
pancuronium	-0.321602
kenpaullone	-0.321189
NNC-711	-0.321063
dantron	-0.319376
ceramide	-0.319032
fludroxycortide	-0.318575
tamoxifen	-0.318502
duloxetine	-0.317967
PD-102807	-0.317727
pimethixene	-0.316564
estradiol-cypionate	-0.315937
raltitrexed	-0.315181
taxifolin	-0.315097
edrophonium	-0.314853
bisacodyl	-0.31463
strychnine	-0.314622
CDK1-5-inhibitor	-0.314521
BML-190	-0.314175
SU-11274	-0.313147
benperidol	-0.312272
latanoprost	-0.311334
canertinib	-0.309808
cromoglicic-acid	-0.309256
NAN-190	-0.309084
olvanil	-0.307857
midostaurin	-0.307809
tetracaine	-0.307723
RS-67333	-0.307669
nitrocaramiphen	-0.307629
lestaurtinib	-0.307599
eliprodil	-0.307584
QX-314	-0.306525
CP-93129	-0.306506
progesterone	-0.305891
ruxolitinib	-0.30542
sunitinib	-0.304653
metoprolol	-0.303334
diphemanil	-0.302034
lamivudine	-0.301668
ritonavir	-0.301663
cabergoline	-0.30108
thiamphenicol	-0.300204
RS-39604	-0.299086
medroxyprogesterone	-0.298533
monastrol	-0.298186
cisplatin	-0.297963
acetylcholine	-0.297293
isradipine	-0.296844
CGP-57380	-0.296742
NTNCB	-0.295572
MY-5445	-0.294955
WYE-354	-0.294933
thiotepa	-0.29321
perphenazine	-0.293085
ethionamide	-0.292434
SU-4312	-0.291649
mirtazapine	-0.291268
GR-103691	-0.289025
fexaramine	-0.288293
pirenperone	-0.288006
ezetimibe	-0.287415
terguride	-0.287015
flucytosine	-0.286062
rifapentine	-0.285477
GW-441756	-0.284281
T-0901317	-0.284169
lopinavir	-0.283699
fluocinonide	-0.280579
tetrindole	-0.28022
CGS-20625	-0.278721
cediranib	-0.277987
gavestinel	-0.275735
GW-6471	-0.275675
PIK-75	-0.274872
gestrinone	-0.274622
ZM-306416	-0.274344
desoxycortone	-0.273918
BMS-387032	-0.273772
ACDPP	-0.273391
nalidixic-acid	-0.271984
GW-5074	-0.27164
RITA	-0.270261
nefazodone	-0.269851
KB-R7943	-0.269067
reversine	-0.268943
deracoxib	-0.268618
NVP-TAE684	-0.268515
bufexamac	-0.268405
tracazolate	-0.267547
etazolate	-0.267479
secnidazole	-0.267144
amodiaquine	-0.266808
PD-160170	-0.265712
GTP-14564	-0.265253
linifanib	-0.265129
cefdinir	-0.264112
pioglitazone	-0.26307
UCL-2077	-0.262803
mefloquine	-0.26146
bupropion	-0.261423
fendiline	-0.26135
PK-11195	-0.261294
nefopam	-0.261274
paroxetine	-0.261077
memantine	-0.260629
AM-251	-0.260166
acarbose	-0.259804
DAU-5884	-0.259127
isotretinoin	-0.258912
dirithromycin	-0.258541
imatinib	-0.25846
ifenprodil	-0.257082
SNS-314	-0.256995
ketorolac	-0.256722
sulfadoxine	-0.256496
oxidopamine	-0.255796
troglitazone	-0.255759
latrunculin-b	-0.254823
rosiglitazone	-0.254698
promethazine	-0.253895
iloprost	-0.252873
SB-415286	-0.250721
dexamethasone	-0.250584
